# Supplementary material for: Association of natural light exposure and delirium according to the presence or absence of windows in the intensive care unit
Source: PubMed Central journal article supplement — Acute Crit Care. 2021 Nov 26;36(4):332–41. doi: 10.4266/acc.2021.00556 (PMC8907453; doi:10.4266/acc.2021.00556), 2021-11-26
Supplement: acc-2021-00556-suppl1.pdf [file acc-2021-00556-suppl1.pdf]

**Supplementary Table 1.** Reflective measurement (lux)

|     | Windowless               | Window                        | P-value |
|-----|--------------------------|-------------------------------|---------|
| 10A | 892.75 (819.375–922.875) | 1,143.24 (1,092.375–1,267.75) | <0.001  |
| 2P  | 908.25 (824.75–923.125)  | 1,316 (1,237.5–1,455.875)     | <0.001  |
| 6P  | 909.75 (817.75–929.125)  | 1,030.5 (991.5–1,091.125)     | 0.001   |
| All | 904.75 (838.125–921.375) | 1,143.25 (1,074.625–1,280)    | <0.001  |

Illuminance measured at different hours of the day in rooms with windows or without windows.

The digital light meter used was LUX HiTESTER 3423 manufactured by HIOKI.
