# Supplementary figures and images for: Association of natural light exposure and delirium according to the presence or absence of windows in the intensive care unit
Source: PubMed Central journal article supplement — Acute Crit Care. 2021 Nov 26;36(4):332–41. doi: 10.4266/acc.2021.00556 (PMC8907453; doi:10.4266/acc.2021.00556), 2021-11-26

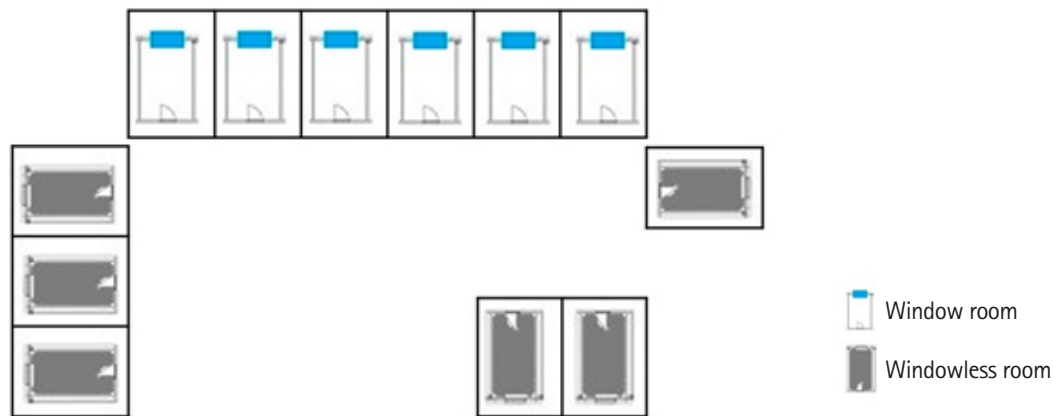

**Supplementary Figure 1.** The layout of the medical intensive unit.

Supplement: acc-2021-00556-suppl5.pdf [file acc-2021-00556-suppl5.pdf]
